# Supplementary material for: Non-fouling polymer brush grafted fluorine-doped tin oxide enabled optical and chemical enhancement for sensitive label-free antibody microarrays
Source: Royal Society of Chemistry journal article supplement (doi:10.1039/d3lc00042g), 2023-01-01
Supplement: d3lc00042g1.pdf [file d3lc00042g1.pdf]

Electronic Supplementary Materials for

**Non-fouling polymer brush grafted fluorine-doped tin oxide enabled optical and chemical enhancement for sensitive label-free antibody microarrays**

*Xiaoyi Li, Zhihao Feng, Changxiang Fang, Yunpeng Wei, Dandan Ji, and Weihua Hu\**

Key Laboratory of Luminescence Analysis and Molecular Sensing (Southwest University),  
Ministry of Education; School of Materials and Energy, Southwest University, Chongqing 400715,  
P. R. China. Email: [whhu@swu.edu.cn](mailto:whhu@swu.edu.cn) (W. Hu)

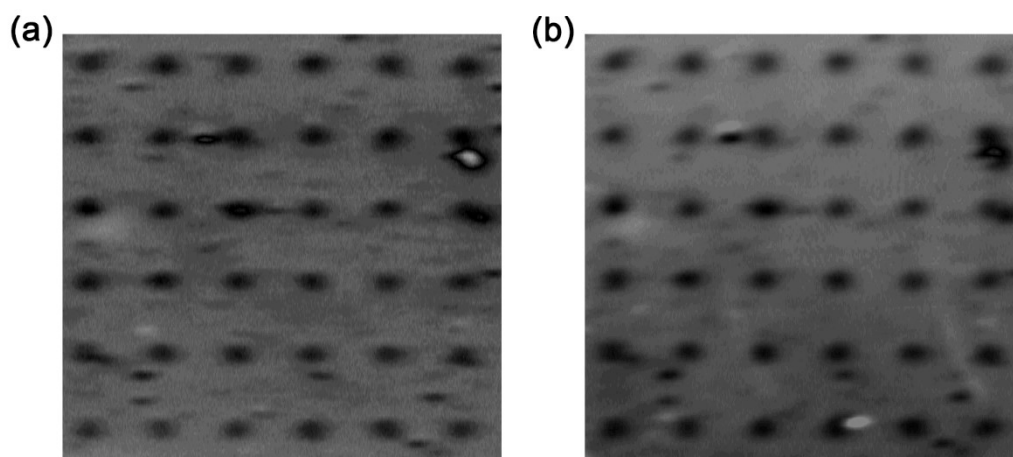

**Fig. S1.** OIRD images of microarray before (a) and after (b) reacting with  $1 \mu\text{g mL}^{-1}$  CRP.

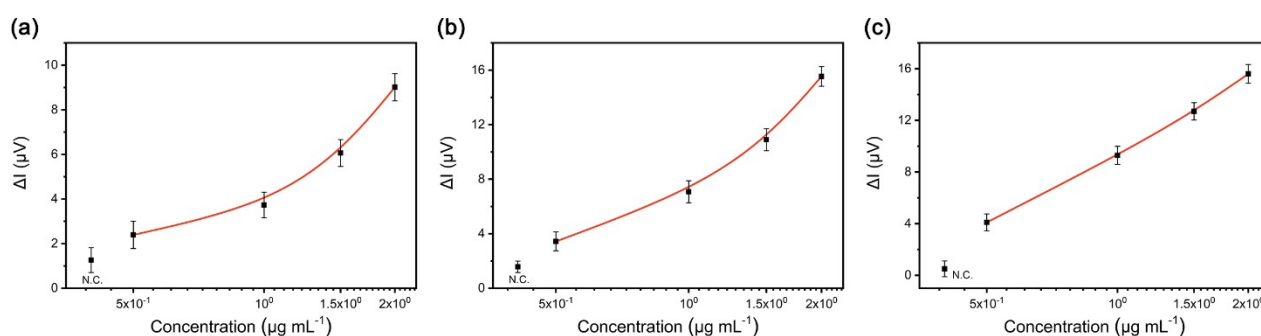

**Fig. S2.** Dose-response curve for detection of CRP on GPTES-glass (a), on GPTES-FTO (b) and on POEGMA-co-GMA-glass (c).

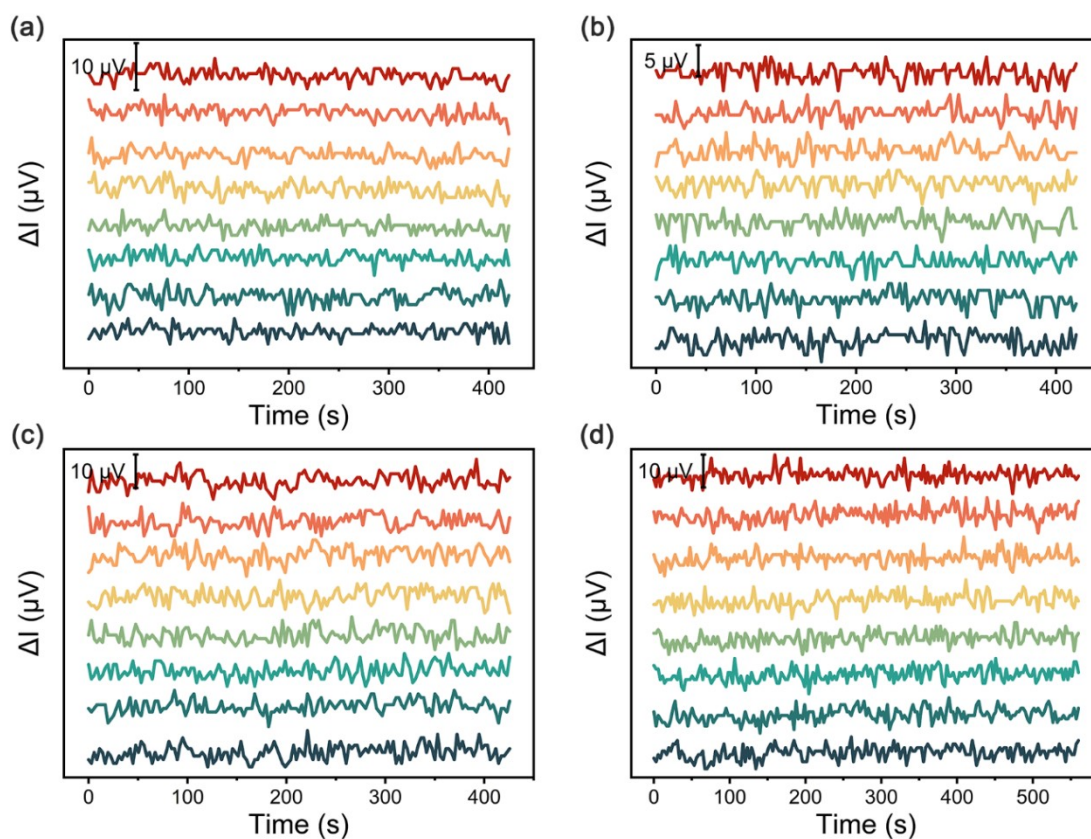

**Fig. S3.** *In situ* OIRD signals collected on POEGMA-co-GMA-FTO (a), POEGMA-co-GMA-glass (b), GPTES-FTO (c) and GPTES-glass (d) in 0.01 M PBS buffer. For each chip, the signals collected on 8 spots were shown.

**Table S1.** Thickness of POEGMA-co-GMA brush growth on FTO surface measured by ellipsometer.

| Site              | a     | b     | c     | d     | e     |
|-------------------|-------|-------|-------|-------|-------|
| Thickness<br>(nm) | 58.11 | 58.56 | 57.96 | 59.11 | 58.31 |

**Table S2.** Performance of POEGMA-co-GMA brush based microarray for clinical samples.

| Sample | Initial<br>concentration<br>( $\mu\text{g mL}^{-1}$ ) <sup>a</sup> | Dilution<br>multiples <sup>b</sup> | Measured<br>concentration<br>( $\mu\text{g mL}^{-1}$ ) <sup>c</sup> | Recovery<br>(%) <sup>d</sup> |
|--------|--------------------------------------------------------------------|------------------------------------|---------------------------------------------------------------------|------------------------------|
| 10E99  | 27                                                                 | 27                                 | 0.79                                                                | 79.68                        |
| 10E150 | 25.4                                                               | 20                                 | 0.80                                                                | 80.08                        |

<sup>a</sup> the concentration determined by ELISA; <sup>b</sup> dilution multiple at which the sample was diluted before detecting with POEGMA-co-GMA-glass OIRD chip; <sup>c</sup> the concentration determined by POEGMA-co-GMA-glass OIRD chip; <sup>d</sup> Recovery = measured concentration  $\times$  Dilution multiple / initial concentration  $\times$  100%.

## Optical computation

OIRD achieves real time monitoring of surface/interface processes by measuring the time-lapsed difference between the relative changes in the reflectivity of p-polarized light and s-polarized light.

According to the OIRD principle, the OIRD signal of  $I(2\Omega)$  from a certain interface is described by eqn (E1):

$$I(2\Omega) = I_0(|r_{p0}|^2 \cos^2 \alpha - |r_{s0}|^2 \sin^2 \alpha) J_2(A) \quad (E1)$$

where  $\Omega$  is the modulation frequency of the photoelastic modulator.  $I_0$  is the initial light intensity of the laser.  $r_{p0}$  and  $r_{s0}$  are the p-polarized and s-polarized reflectivity of the surface, respectively.  $\alpha$  is the angle between the optical axis of the polarization analyzer and the p-polarized light.  $J_2(A)$  is the second kind Bessel function, where  $A$  is the amplitude of the modulation phase of the photoelastic modulator.

For microarray chips with functional layer, the reflective interface before detection can be described with a glass/functional layer/solution three-layer model (Figure 6a). The probe attached to the surface of the chip is treated as a part of the functional layer for simplification.  $\epsilon_s$ ,  $\epsilon_p$  and  $\epsilon_0$  represent the dielectric constants of glass, functional layer and solution, respectively.  $\varphi_s$ ,  $\varphi_p$  and  $\varphi_0$  represent the angles of incidence in glass, functional layer and solution.  $h$  represents the thickness of functional layer.

The OIRD signal ( $I_b(2\Omega)$ ) collected on the surface of the microarray chip before detection is described as:

$$I_b(2\Omega) = I_0(|r_{3p}|^2 \cos^2 \alpha - |r_{3s}|^2 \sin^2 \alpha) J_2(A) \quad (E2)$$

Among them,  $r_{3p}$  and  $r_{3s}$  represent the reflectance of p-polarized light and s-polarized light at the functional layer/solution interface, respectively.  $|r_{3p}|$  and  $|r_{3s}|$  are the amplitudes of  $r_{3p}$  and  $r_{3s}$ .

After detection, the reflective interface can be described with a glass/functional layer/target/solution four-layer model (Figure 6a). The captured target biomolecules are scattered on the surface of the chip, which we have assumed to be a thin layer with an average thickness of  $d$  for analysis.  $\epsilon_d$  and  $\varphi_d$  represent the dielectric constant and incident angle of the target protein, respectively.

Similarly, the OIRD signal ( $I_a(2\Omega)$ ) collected on the surface of the microarray chip after detection can be described as:

$$I_a(2\Omega) = I_0(|r_{4p}|^2 \cos^2 \alpha - |r_{4s}|^2 \sin^2 \alpha) J_2(A) \quad (E3)$$

Among them,  $r_{4p}$  and  $r_{4s}$  represent the reflectance of p-polarized light and s-polarized light at the target/solution interface, respectively.  $|r_{4p}|$  and  $|r_{4s}|$  are the amplitudes of  $r_{4p}$  and  $r_{4s}$ .

The  $\Delta I(2\Omega)$  signal originates from the glass/functional layer/solution three-layer to glass/functional layer /target/solution four-layer transformation. According to eqn (E1), the differential OIRD signal of  $\Delta I(2\Omega)$  could be calculated by subtracting the original  $I_b(2\Omega)$  signal before detection from the final  $I_a(2\Omega)$  signal after detection as follows:

$$\Delta I(2\Omega) = I_a(2\Omega) - I_b(2\Omega) = I_0[ (|r_{4p}|^2 - |r_{3p}|^2) \cos^2 \alpha - (|r_{4s}|^2 - |r_{3s}|^2) \sin^2 \alpha ] J_2(A) \quad (E4)$$

According to the Fresnel formula, the reflectivity of p-polarized light and s-polarized light in the glass/functional layer /solution three-layer model respectively are:

$$r_{3p} = \frac{r_{sp}^{(p)} + r_{p0}^{(p)} e^{2i\psi_1}}{1 + r_{sp}^{(p)} r_{p0}^{(p)} e^{2i\psi_1}} \quad (E5)$$

$$r_{3s} = \frac{r_{sp}^{(s)} + r_{p0}^{(s)} e^{2i\psi_1}}{1 + r_{sp}^{(s)} r_{p0}^{(s)} e^{2i\psi_1}} \quad (E6)$$

Here,

$$\psi_1 = \frac{2\pi}{\lambda} h \sqrt{\epsilon_p} \cos \varphi_p \quad (E7)$$

Among them,  $r_{sp}^{(p)}$  and  $r_{sp}^{(s)}$  represents the reflectance of p-polarized light and s-polarized light at the glass/functional layer interface, respectively.  $r_{p0}^{(p)}$  and  $r_{p0}^{(s)}$  represent the reflectance of p-polarized light and s-polarized light at the functional layer/solution interface, respectively.

According to the optical transmission matrix theory, the reflectivity of p-polarized light and s-polarized light in the glass/functional layer/target/solution four-layer model respectively are:

$$r_{4p} = \frac{r_{sp}^{(p)} + r_{pd}^{(p)} e^{2i\psi_1} + r_{d0}^{(p)} e^{2i(\psi_1 + \psi_2)} + r_{sp}^{(p)} r_{pd}^{(p)} r_{d0}^{(p)} e^{2i\psi_2}}{1 + r_{sp}^{(p)} r_{pd}^{(p)} e^{2i\psi_1} + r_{sp}^{(p)} r_{d0}^{(p)} e^{2i(\psi_1 + \psi_2)} + r_{pd}^{(p)} r_{d0}^{(p)} e^{2i\psi_2}} \quad (E8)$$

$$r_{4s} = \frac{r_{sp}^{(s)} + r_{pd}^{(s)} e^{2i\psi_1} + r_{d0}^{(s)} e^{2i(\psi_1 + \psi_2)} + r_{sp}^{(s)} r_{pd}^{(s)} r_{d0}^{(s)} e^{2i\psi_2}}{1 + r_{sp}^{(s)} r_{pd}^{(s)} e^{2i\psi_1} + r_{sp}^{(s)} r_{d0}^{(s)} e^{2i(\psi_1 + \psi_2)} + r_{pd}^{(s)} r_{d0}^{(s)} e^{2i\psi_2}} \quad (E9)$$

Here,

$$\psi_2 = \frac{2\pi}{\lambda} d \sqrt{\epsilon_d} \cos \varphi_d \quad (E10)$$

Among them,  $r_{pd}^{(p)}$  and  $r_{pd}^{(s)}$  represents the reflectance of p-polarized light and s-polarized light at the functional layer/target interface, respectively.  $r_{d0}^{(p)}$  and  $r_{d0}^{(s)}$  represent the reflectance of p-polarized light and s-polarized light at the target/solution interface, respectively.

In general, the reflectivity of p-polarized light and s-polarized light at the a/b interface can be calculated by the

following equation:

$$r_{ab}^{(p)} = \frac{\sqrt{\varepsilon_a} \cos \varphi_b - \sqrt{\varepsilon_b} \cos \varphi_a}{\sqrt{\varepsilon_a} \cos \varphi_b + \sqrt{\varepsilon_b} \cos \varphi_a} \quad (\text{E11})$$

$$r_{ab}^{(s)} = \frac{\sqrt{\varepsilon_a} \cos \varphi_a - \sqrt{\varepsilon_b} \cos \varphi_b}{\sqrt{\varepsilon_a} \cos \varphi_a + \sqrt{\varepsilon_b} \cos \varphi_b} \quad (\text{E12})$$

Among them,  $r_{ab}^{(p)}$  and  $r_{ab}^{(s)}$  represent the reflectance of p-polarized light and s-polarized light at the a/b interface of the substance.  $\varepsilon_a$  and  $\varepsilon_b$  represent the dielectric constants of substances a and b, respectively.  $\varphi_a$  and  $\varphi_b$  represent the angles of incidence in media a and b, respectively.

Substitute the equation E5-E12 into the equation E4, and ignore the initial light intensity  $I_0$  and give the corresponding parameters, the variation law of the frequency-doubling signal intensity with the thickness of the functional layer can be calculated. Some parameters are assigned to facilitate the calculation: the wavelength of the incident laser  $\lambda=632.8$  nm; the angle between the optical axis of the polarization analyzer and the p-polarized light  $\alpha = \pi/2$ ; the modulation frequency of the photoelastic modulator  $\Omega=50$  kHz; the amplitude of the modulation phase of the photoelastic modulator  $A=\pi$ ; the refractive index of the glass slide  $n_s = 1.50$ ; the refractive index of the solution  $n_0 = 1.33$ ; the refractive index of FTO layer  $n_p = 2.10$ ; the refractive index of the bound target protein  $n = 1.5$ .

The results shown in Fig. 7b are obtained by using different  $n_p$  and  $h$  for four chips. For GPTES-glass chip, use GPTES layer as the functional layer:  $n_{p1} = 1.2$ ,  $h_1 = 2$  nm. For GPTES-FTO chip:  $n_{p2} = 2.1$ ,  $h_2 = 350$  nm. For POEGMA-co-GMA-glass chip:  $n_{p3} = 1.46$ ,  $h_3 = 58$  nm. For POEGMA-co-GMA-FTO chip:  $n_{p4} = 1.976$ ,  $h_4 = 58 + 350 = 408$  nm.

We note that in this calculation, a single “functional layer” is used to model the FTO-brush layer for POEGMA-co-GMA-FTO chip to facilitate the four-layer model; a more accurate model should consider FTO and polymer brush as separated layers as their dielectric constants are different. Unfortunately the high-level five-layer calculation is complicated and we currently do not have the infrastructure and knowledge required for this simulation. Therefore, FTO-brush is treated as a single layer in POEGMA-co-GMA-FTO chip and its effective dielectric constant is calculated with the following formula:

$$\varepsilon_p = \frac{(h_a + h_b) \varepsilon_{pa} * \varepsilon_{pb}}{h_a * \varepsilon_{pb} + h_b * \varepsilon_{pa}} \quad (\text{E13})$$

Where,  $h_a$  and  $\varepsilon_{pa}$  are the thickness and dielectric constant of the first sensing layer, and  $h_b$  and  $\varepsilon_{pb}$  are the thickness and dielectric constant of the second sensing layer. For POEGMA-co-GMA-FTO based chip, the refractive index of POEGMA-co-GMA brush layer  $n_{PEG} = 1.46$ , and that of FTO layer  $n_{FTO} = 2.10$ . According to Formula E13, the refractive index of the sensing layer can be calculated as 1.976.

## References including

- (1) Li, X.; Fang, C.; Feng, Z.; Li, J.; Li, Y.; Hu, W. Label-free OIRD microarray chips with a nanostructured sensing interface: enhanced sensitivity and mechanism, *Lab Chip*, **2022**, 22 (20), 3910-3919
- (2) Zhong, C.; Li, L.; Mei, Y.; Dai, J.; Hu, W.; Lu, Z.; Liu, Y.; Li, C. M.; Lu, H. B. Chip architecture-enabled sensitivity enhancement of oblique-incidence reflectivity difference for label-free protein microarray detection, *Sens. Actuators B Chem.*, **2019**, 294, 216-223
- (3) Dai, J. Label-free detection of biomolecular interactions by oblique incidence reflectivity difference method. PhD thesis, Institute of Physics, Chinese Academy of Sciences and The University of Chinese Academy of Sciences, **2014**
- (4) Nagib, N. N.; Khodier, S. A. Applications of the Poincaré sphere in polarization metrology. *Opt. Laser. Technol.*, **2000**, 32 (5), 373-377
- (5) Born, M.; Wolf, E. Principles of optics: electromagnetic theory of propagation, interference and diffraction of light, *Elsevier*, **2013**
- (6) Zhu, X. D.; Fei, Y. Y.; Wang, X.; Lu, H. B.; Yang, G. Z. General theory of optical reflection from a thin film on a solid and its application to heteroepitaxy, *Phys. Rev. B*, **2007**, 75 (24).245434
- (7) Liu, S.; Zhu, J. H.; He, L. P.; Dai, J.; Lu, H. B.; Wu, L.; Jin, K. J.; Yang, G. Z.; Zhu, H. Label-free, real-time detection of the dynamic processes of protein degradation using oblique-incidence reflectivity difference method, *Appl. Phys. Lett.*, **2014**, 104 (16).163701
- (8) Zhu X D. Symmetry consideration in zero loop-area Sagnac interferometry at oblique incidence for detecting magneto-optic Kerr effects. *Rev. Sci. Instrum.*, **2017**, 88 (8).083112
